# Supplementary material
Source: MDPI journal article supplement (https://www.mdpi.com/2037-0164/15/1/9)

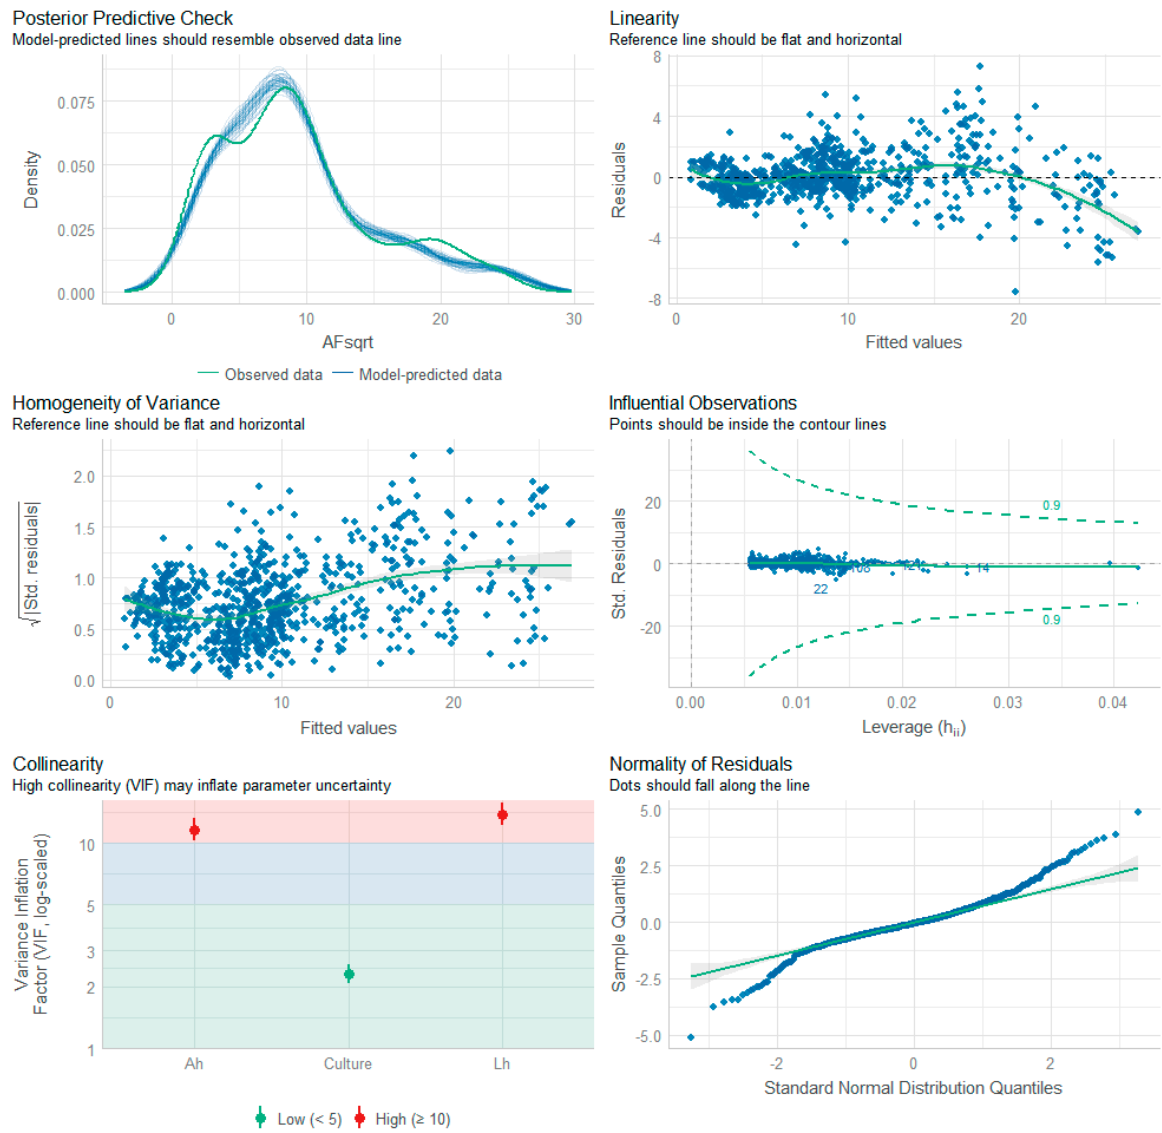

**Figure S1.** Diagnostic plots for regression model assessment using the `check_model` function.

Supplement: s1 [file s1]
